# Supplementary material for: Seasonal fluctuation of oribatid mite communities in forest microhabitats
Source: PeerJ. 2018 Jun 4;6:e4863. doi: 10.7717/peerj.4863 (PMC5991301; doi:10.7717/peerj.4863)
Supplement: Table S2 [file peerj-06-4863-s003.xlsx]

## Sheet: Tabelle3
		January			February			March			April			May			June			July			August			September			October			November			December
		moss	dw	litter	moss	dw	litter	moss	dw	litter	moss	dw	litter	moss	dw	litter	moss	dw	litter	moss	dw	litter	moss	dw	litter	moss	dw	litter	moss	dw	litter	moss	dw	litter	moss	dw	litter
Enarthronota
	Brachychthoniidae spp. (unidentified)	2000	2019.77	0	1150	2249.78	291.385	58263.2	1793.83	555.556	47000	1294.12	142.857	10078.1	0	0	2606.38	0	384.615	5166.67	208.333	0	1454.55	862.879	263.158	1454.55	625	767.045	1547.62	0	0	2500	0	0	1250	1565.17	277.778
	Cosmochthonius lanatus (Michael, 1885)	0	0	0	0	0	0	0	0	0	0	0	0	0	0	0	0	0	0	0	0	0	0	40	0	0	0	0	0	0	0	0	0	0	0	0	0
	Eniochthonius minutissimus (Berlese, 1903)	125	17004.4	655.175	269.358	22052.3	4012.44	23949.4	20664	5172.44	219700	2181.11	8932.88	20706.7	3062.37	2250	24671.2	27982.5	4823.26	46425	4889.58	5454.91	11579.5	16435.6	4266.81	18378.8	1910.71	5905.85	45719	10143.4	3935.56	9871.79	17762.1	1677.94	214.286	20471.4	1032.2
	Hypochthonius rufulus (Koch, 1835)	0	149.733	181.818	0	580.952	474.074	0	0	526.696	10000	1023.22	3714.29	342.857	597.403	200	1200	1427.38	6437.5	24333.3	1792.64	1454.45	5212.12	610.38	487.218	3666.67	466.667	2332.05	20100	450	419.481	3500	516.484	985.965	250	441.667	514.286
	total	2125	19173.9	836.993	1419.36	24883	4777.9	82212.6	22457.8	6254.69	276700	4498.45	12790	31127.7	3659.77	2450	28477.5	29409.9	11645.4	75925	6890.56	6909.36	18246.2	17948.8	5017.18	23500	3002.38	9004.94	67366.7	10593.4	4355.04	15871.8	18278.6	2663.91	1714.29	22478.2	1824.26
Mixonomata
	Microtritia minima (Berlese, 1904)	0	881.119	47.619	0	2354.29	133.333	19.6078	181.818	0	0	0	142.857	0	1336.96	500	3040	8363.64	325.397	119.048	2011.2	1927.63	0	4720	51.2987	0	3714.29	66.6667	0	672.222	47.619	0	1201.92	0	0	66.6667	155.806
	Phthiracaridae spp. (unidentified)	20705.3	26596.2	2864.64	14336	14055.1	8588.91	56297.2	95795.3	7919.82	213714	54290.5	2523.81	31333.2	9368.61	6549.25	45890.4	22585.9	11103.7	18732.1	8718.26	3102.77	17737.5	7038.7	2022.61	16157.6	9856.82	6618.48	49866.7	26945.5	8458.04	35951.6	14799.5	9482.46	15404.8	8944.17	6231.73
	Rhysotritia duplicata (Grandjean, 1953)	0	125	0	0	0	0	0	0	0	0	0	0	0	0	0	0	0	0	0	0	0	0	0	0	0	0	0	0	0	0	0	0	0	0	0	0
	total	20705.3	27602.3	2912.26	14336	16409.3	8722.24	56316.8	95977.1	7919.82	213714	54290.5	2666.67	31333.2	10705.6	7049.25	48930.4	30949.6	11429.1	18851.2	10729.5	5030.41	17737.5	11758.7	2073.91	16157.6	13571.1	6685.15	49866.7	27617.7	8505.66	35951.6	16001.4	9482.46	15404.8	9010.84	6387.54
Nothrina
	Camisia spinifer (Koch, 1835)	0	0	0	200	0	0	0	0	0	0	0	0	0	0	0	500	0	0	200	0	0	0	0	0	0	0	0	1200	0	0	0	0	0	0	0	0
	Nanhermannia nana (Nicolet, 1855)	0	88.8889	0	0	0	214.064	0	0	313.131	0	125	0	142.857	0	250	0	0	257.479	250	43.4783	196.172	90.9091	170.909	159.065	0	266.667	266.667	0	71.4286	90.9091	500	0	0	1000	0	66.6667
	Nothrus palustris (Koch, 1839)	0	111.111	283.73	0	0	190.988	0	0	565.657	0	71.4286	95.2381	0	186.335	0	1000	233.766	2129.12	0	200	670.455	0	118.462	273.206	1200	0	333.59	333.333	272.727	226.147	0	125	511.477	0	66.6667	442.909
	Nothrus silvestris (Koch, 1839)	250	311.373	330.357	200	34.4828	608.237	3333.33	0	1040.4	15642.9	814.076	142.857	7095.24	0	1971.43	12662.2	181.818	1200.4	1000	290.909	1087.8	963.636	274.854	208.256	0	266.667	389.423	200	472.727	1274.6	1500	0	1158.73	0	0	712.254
	Platynothrus peltifer (Koch, 1839)	991.667	1033.3	1160.11	2021.74	449.195	16548.9	1000	2000	7405.48	11035.7	1490.97	3525.35	0	268.541	19014.2	0	3058.44	7839.97	24490.5	1791.63	9520	13879.4	3701.46	9124.78	9309.09	1063.96	17297.7	39371.4	3605.49	7473.51	10333.3	1088.03	7616.81	2000	311.111	6155.33
	total	1241.67	1544.67	1774.19	2421.74	483.678	17562.2	4333.33	2000	9324.68	26678.6	2501.47	3763.44	7238.1	454.876	21235.7	14162.2	3474.03	11427	25940.5	2326.02	11474.4	14933.9	4265.69	9765.31	10509.1	1597.29	18287.3	41104.8	4422.38	9065.17	12333.3	1213.03	9287.02	3000	377.778	7377.16
Brachypylina
	Adoristes ovatus (Koch, 1839)	18985.8	5595.94	11806.2	14928.6	993.16	2735.25	55126.9	4899.65	5461.4	45557.1	3665.78	447.005	2628.72	714.969	1335.36	11890.2	742.857	1471.76	1400	396.172	1208	4491.84	251.93	1500.31	7193.94	295.671	3465.69	39914.3	1826.19	13980.1	35243.6	1569.44	14856.8	10750	555.929	8667.85
	Achipteria coleoptrata (Linné, 1758)	2200	794.444	4877.53	316.977	172.578	2378.46	5666.67	3500	8898.36	21592.9	1200	1047.62	600	0	3220.58	282.398	2410.26	3735.81	0	114.907	2123.87	83.3333	62.5	892.236	700	0	970.408	2766.67	0	2992.21	3307.69	0	2080.22	333.333	0	1210.61
	Achipteria nitens (Nicolet, 1855)	630.952	681.75	897.727	1135.51	141.149	907.402	1368.42	0	1819.08	21600	1557.14	857.143	241.667	0	584.615	1379.24	3553.57	13488.1	5500	71.4286	1404.9	681.818	196.356	627.891	500	125	664.679	3000	265.152	2501.73	2549.86	0	176.471	0	0	681.818
	Astegistes pilosus (Koch, 1840)	0	688.889	0	0	0	0	0	125	90.9091	0	125	0	1000	43.4783	0	0	362.637	0	0	96.1098	76.9231	0	191.111	134.675	700	0	76.9231	0	469.78	0	0	0	284.722	333.333	0	0
	Autogneta longilamellata (Michael, 1885)	750	240.642	0	450	412.578	0	3000	38653.8	90.9091	139000	4865.91	0	4891.96	142.857	0	2481.82	15285.7	0	250	1680.12	0	200	971.061	0	0	1539.29	0	0	3051.99	0	1148.15	10000	0	0	58.8235	0
	Banksinoma lanceata (Michael, 1885)	500	2082.92	0	0	2502.62	0	16000	9926.57	0	3000	1548.5	0	16000	571.429	0	400	4692.31	0	0	243.478	0	400	559.295	0	5000	267.857	0	500	2317.05	0	0	923.077	0	0	1885.08	0
	Berniella sigma (Strenzke, 1951)	250	0	0	21.7391	133.333	82.5826	8058.82	0	202.02	4200	0	0	400	0	0	240	166.667	76.9231	583.333	0	0	0	0	0	0	0	0	0	71.4286	0	1500	0	0	666.667	0	0
	Carabodes spp. (Koch, 1835)	1879.89	4527.72	1027.34	5434.89	5638.02	2622.48	23307.5	12253.6	1748.74	94507.1	7596.11	96.7742	22011.9	650.846	1925.32	39015.9	8413.11	1150.41	24225	2075.65	1797.22	16227.8	5619.98	489.497	3730.3	2048.05	1481.37	19185.7	2624.26	6116.94	12612.5	2147.44	3969.29	10261.9	2412.32	2017.32
	Cepheus cepheiformis (Nicolet, 1855)	889.411	1003.61	1039.35	2991.38	297.806	3208.57	9308.57	3271.43	1432.36	16878.6	384.564	720.43	1819.2	0	1867.53	7403.64	90.9091	3451.77	7265.48	0	542.832	7532.58	80	413.56	3709.09	433.766	256.346	9709.52	182.54	1353.39	10759.3	111.111	1488.23	12595.2	112.121	1642.27
	Ceratoppia bipilis (Hermann, 1904)	5000	440.559	0	6506.55	423.81	0	1000	0	71.4286	4450	0	0	0	0	0	625	233.766	55.5556	0	0	0	83.3333	0	0	90.9091	0	0	1166.67	0	55.5556	500	0	66.6667	500	0	90.9091
	Ceratozetes cf gracilis (Michael, 1884)	1000	0	0	0	0	0	0	0	0	1000	0	0	0	0	0	0	0	0	0	0	0	0	0	0	0	0	0	0	0	0	0	0	0	0	0	214.286
	Chamobates borealis (Trägardh, 1902)	0	250	0	0	0	0	0	0	0	0	0	0	0	0	0	19600	0	0	0	0	0	0	0	0	0	0	0	0	0	0	0	0	0	0	0	0
	Chamobates cuspidatus (Michael, 1884)	41099.8	1994.52	7169.6	32797.8	744.444	1618.33	195160	1296.4	8442.73	108821	3111.54	463.902	32016.7	767.857	4507.99	28535.2	7093.16	13997.1	14889.3	1299.14	2734.6	11280.9	693.611	1358.38	6906.06	609.524	3074.49	9666.67	200	1796.39	9018.52	848.291	1050.4	19166.7	355.556	648.413
	Chamobates subglobulus (Oudemanns, 1900)	0	0	0	0	0	0	0	0	111.111	1000	0	0	200	43.4783	0	0	600	0	0	0	0	0	0	29.4118	0	0	0	0	0	0	0	0	0	0	0	0
	Cultroribula bicultrata (Berlese, 1905)	1000	1181.82	0	0	0	55.5556	0	0	0	0	0	0	1015.62	0	0	0	142.857	71.4286	0	105.263	0	111.111	90.9091	29.4118	0	0	0	0	545.455	0	0	0	47.619	0	0	0
	Cultroribula juncta (Michael, 1885)	0	0	0	0	0	0	0	0	0	0	0	0	0	0	0	0	0	0	0	0	0	0	0	0	0	0	0	0	0	0	0	0	0	0	0	0
	Cymberemaeus cymba (Nicolet, 1855)	0	22.2222	0	0	122.222	31.25	0	0	0	3750	233.766	0	13463.5	90.9091	181.818	261.277	76.9231	2071.43	1033.33	52.6316	143.541	125	0	0	0	325	0	1166.67	340.909	47.619	1000	142.857	0	0	0	52.6316
	Damaeus gracilipes (Kulczynski, 1902)	0	0	0	0	0	0	0	0	0	71600	647.059	0	0	0	0	0	0	0	0	0	0	0	0	0	0	0	0	500	0	0	0	0	0	0	0	118.056
	Damaeus onustus (Koch, 1841)	13030	6416.74	849.544	12342.3	2121.35	527.896	82369.5	2076.92	1601.1	36700	235.294	47.619	7105.21	603.084	7581.37	9468.01	2321.4	4766.87	5179.76	1285.14	1792.47	476.852	341.818	271.743	2633.33	324.675	924.149	10019	642.857	873.882	13393.2	902.778	609.249	18511.9	499.3	47.619
	Dissorhina ornata (Oudemans, 1900)	1125	76.9231	47.619	20.8333	66.6667	0	39.2157	0	0	800	0	0	7488.84	0	0	1560	428.571	0	6661.9	0	125	418.519	0	21.2766	636.364	90.9091	0	2800	0	0	4500	111.111	111.111	2583.33	111.111	147.87
	Dometorina plantivaga (Berlese, 1895)	0	0	0	0	0	0	0	0	0	1000	0	0	13049	0	0	3019.61	125	0	200	0	0	0	0	0	0	0	0	766.667	250	47.619	0	0	0	0	0	0
	Eupelops plicatus (Koch, 1836)	10347.9	2379.55	304.894	8657.53	138.095	27.027	23915.4	1142.86	1233.68	18778.6	638.136	317.972	701.339	125	776.923	13315.9	181.818	1236.11	11691.7	0	268.541	3810.19	152.778	65.2805	963.636	200	206.09	22081	71.4286	470.707	19391.7	362.637	623.229	16131	476.19	320.635
	Euzetes globulus (Nicolet, 1855)	267.857	903.482	1170.77	1911.1	292.578	1144.32	1844.17	290.909	2161.62	1750	723.109	32.2581	1142.86	306.818	428.571	4291.8	1416.48	3425.14	3007.14	812.526	503.456	600	475.132	932.614	290.909	0	1399.51	2495.24	928.571	2314.43	2482.91	1584.2	1183.46	0	125.49	1131.9
	Galumna lanceata (Oudemans, 1900)	0	333.333	0	0	106.667	110.145	0	0	62.5	0	1250	0	0	0	90.9091	0	200	0	0	0	0	0	0	81.203	0	0	90.9091	0	0	0	0	201.923	0	0	0	62.5
	Hermannia gibba (Koch, 1839)	37929.9	16941.7	2899.47	26478.3	4253.85	216.407	217224	45379.2	2085.14	422800	29553.5	112.135	21217.4	4204.12	0	44443.7	18441.7	1934.68	42656	5012.94	1188.86	11515.5	4997.48	196.907	27524.2	7768.29	1562.7	26495.2	4318.61	1761.9	106481	11782.7	1649.95	40083.3	3408.95	500.752
	Liacarus coracinus (Koch, 1841)	0	1494.86	83.7766	20.8333	4500.32	38.4615	14000	8089.54	111.111	19342.9	11113.2	0	19108.3	4353.08	0	4000	2628.57	0	666.667	438.596	0	3666.67	3145.83	78.4195	7333.33	1766.67	76.9231	0	7865.08	87.619	333.333	2170.33	158.73	0	3650.78	0
	Liacarus subterraneus (Koch, 1844)	0	0	0	0	0	0	0	0	0	0	0	0	0	0	0	0	0	0	0	0	0	0	40	0	0	0	0	0	0	0	0	0	0	0	0	0
	Licneremaeus licnophorus (Michael, 1882)	0	0	0	0	66.6667	0	0	0	0	3000	0	0	26329.2	0	0	0	0	0	625	200	0	0	0	0	0	0	0	833.333	0	0	0	0	0	0	0	0
	Liebstadia longior (Berlese, 1908)	0	0	0	0	0	0	0	0	0	0	0	0	0	0	0	0	0	0	333.333	0	0	0	40	0	0	0	0	0	0	0	37.037	0	0	0	0	0
	Liebstadia similis (Michael, 1888)	500	0	37.037	0	0	31.25	0	0	0	1000	142.857	0	0	0	0	0	76.9231	125	0	0	0	0	0	66.2055	0	0	215.909	0	0	55.5556	0	0	0	333.333	0	0
	Metabelba pulverosa Strenzke, 1953	1852.38	157.895	1352.96	2484.6	257.778	336.474	3070.18	1000	1508.66	33000	676.471	382.488	2968.3	0	12823.6	8385.61	449.675	6717.64	12490.5	241.667	6869.6	7217.76	66.6667	1431.35	2218.18	373.485	2057.05	2333.33	0	2657.72	4666.67	278.846	2726.85	523.81	441.667	3426.59
	Medioppia subpectinata (Oudemans, 1900)	0	2191.69	0	41.6667	3160	2485.42	0	2090.91	7868.06	619000	49851.5	39142.9	17000	21210.2	8995.45	40764.7	82028.6	18403.8	341250	76544.5	25968.4	7358.08	8826.75	11454.2	4806.06	214.286	4066.67	32100	3331.17	1521.65	410.256	515.152	173.611	333.333	466.667	250
	Microppia minus (Paoli, 1908)	0	600.143	37.037	500	653.333	0	0	1307.69	0	2650	1071.43	0	6647.92	625	0	618.44	428.571	1000	2333.33	86.9565	76.9231	333.333	853.333	0	11000	0	0	0	1273.35	0	0	111.111	0	0	8811.97	66.6667
	Multioppia laniseta (Moritz, 1966)	0	0	228.7	0	453.333	1728.21	3526.32	167.832	486.742	0	12623.9	3129.03	8220.24	8288.61	3609.09	24466.8	37095.7	30313.1	53786.9	3965.15	4220.3	6913.13	4203.88	1292.68	6315.15	1467.86	2682.95	5042.86	1634.37	1287.97	2806.27	485.714	163.743	345.238	514.286	865.132
	Oppia denticulata (G. & R. Canestrini, 1882)	0	0	0	0	0	0	0	2000	0	1600	1764.71	0	0	0	0	0	0	0	3000	0	0	0	0	0	0	0	0	0	0	0	0	0	0	0	0	0
	Oppiella falcata (Paoli, 1908)	1857.14	5101.94	0	747.826	173.333	0	19.6078	1000	0	190893	0	0	18608.8	250	0	1411.53	0	55.5556	2750	1453.25	52.6316	174.242	333.333	0	200	0	0	1833.33	0	0	223.647	167.832	0	0	0	0
	Oppiella nova (Oudemans, 1902)	500	20950.7	512.768	286.957	20851.3	238.462	26210.5	44794.8	90.9091	100100	32061.4	186.335	11291.8	9392.5	601.598	23176.8	24078.5	0	7440.48	15731.2	557.283	5347.47	20506.3	118.03	12766.7	10940.2	400	3042.86	28264.5	45.4545	908.832	29955.5	125	0	24574.8	229.167
	Oribatella quadricornuta (Michael, 1880)	826.316	0	0	850	0	0	4019.61	0	0	2400	0	0	267.857	0	0	1000	0	187.5	0	0	254.652	0	170.909	43.4783	0	142.857	0	733.333	250	55.5556	1833.33	0	100.962	500	0	0
	Oribatula tibialis (Nicolet, 1855)	333.333	0	0	200	2038.1	66.6667	1000	125	0	1000	1675.32	0	0	0	0	0	2076.92	0	0	0	76.9231	0	0	0	500	0	0	0	0	0	0	0	0	0	0	0
	Pantelozetes paolii (Oudemans, 1913)	0	0	875	0	0	0	0	0	0	0	0	0	0	0	0	0	0	0	0	0	0	0	0	0	0	0	0	0	0	590.909	0	0	0	0	222.222	491.342
	Peloptulus phaenotus (Koch, 1844)	0	0	0	0	0	0	0	0	0	200	0	0	0	0	0	0	0	0	0	0	0	0	0	0	0	0	0	0	0	0	0	0	0	0	0	0
	Poroliodes farinosus (Koch, 1840)	7250	22.2222	21.2766	11450	182.857	37.037	7000	285.714	253.247	9000	786.86	0	1666.67	407.445	0	3000	714.286	0	523.81	0	0	0	38.4615	0	200	0	76.9231	400	90.9091	181.818	148.148	90.9091	66.6667	333.333	380.952	153.409
	Punctoribates punctum (Koch, 1839)	0	0	0	0	0	0	0	0	0	0	0	0	0	125	0	200	0	0	0	0	0	0	0	0	0	0	0	0	0	0	0	0	0	0	0	0
	Quadroppia quadricarinata (Michael, 1885)	64647	19788.6	482.413	51135.3	21328.2	534.213	324414	51427.5	1165.95	346650	26180.4	0	46947.5	2191.21	340.909	17006.9	51252.8	764.423	76636.9	14587.6	1394.51	7079.12	6127.11	548.337	73030.3	13737.7	683.485	57981	7630.49	252.814	29965.8	5870.05	66.6667	43583.3	5190.11	863.616
	Scapheremaeus palustris (Sellnick, 1924)	0	0	0	0	0	0	0	0	0	1000	0	0	0	0	0	0	0	0	0	0	0	0	0	0	0	0	0	0	0	0	0	0	0	0	0	0
	Scheloribates laevigatus (Koch, 1835)	95.2381	58.8235	90.9091	0	204.762	0	6000	3000	71.4286	40000	470.588	0	0	0	1200	600	200	71.4286	0	533.333	0	111.111	194.444	0	200	0	0	0	111.111	0	0	0	0	0	200	185.965
	Suctobelbidae spp. (unidentified)	4390.16	5466.95	1820.13	12726.7	3226.23	3046.53	31726.5	12815.9	10033.6	152943	6387.83	1640.55	55334.2	1738.64	6409.09	45823.3	17504.3	5340.66	50595.2	5410.36	3731.22	17899.6	2568.39	2319.24	30387.9	4801.73	1637.12	55176.2	2124.63	1285.11	23019.9	2876.22	461.314	14964.3	1750.34	1460.1
	Tectocepheus spp. (Berlese 1813)	35108.2	50697.6	3557.33	129238	16118.5	2092.76	556180	125500	9053.84	936286	46379.6	361.451	235320	20497.6	90.9091	60161.9	68088	3693.53	115027	30075.1	2850.68	43077.2	32242.9	1613.56	71445.5	15771.2	922.255	76352.4	26193.1	2283.98	134467	12316.9	588.419	6452.38	6712.49	1343.92
	Xenillus clypeator Robineau-Desvoidy, 1839	0	773.601	0	2621.74	0	38.4615	1019.61	400	71.4286	2000	1285.71	0	352.381	0	0	4325	200	180.556	333.333	0	0	1000	62.5	93.3263	0	0	167.832	1733.33	0	262.222	1000	0	188.034	583.333	793.651	52.6316
	Zygoribatula exilis (Nicolet, 1855)	156450	1298.25	0	76013.4	8983.29	154.589	128667	6410.71	90.9091	10231	6692.21	0	9748.96	2469.25	0	16924.2	607.393	236.111	8000	452.632	0	0	80.1282	42.5532	1400	66.6667	66.6667	6700	83.3333	95.2381	29370.4	1121.8	844.444	2166.67	825.397	0
	total	410696	155160	41189.4	402311	100759	26494.2	1.75024e+06	383232	66319	3.49108e+06	256499	48985.6	606806	79813.4	56571.7	440079	354410	118022	800336	162966	59963.4	158216	94184.9	26145.8	282382	63310.6	27227.1	396495	96958.3	44976.1	453080	86647.9	33861.8	202036	64536.2	26944
	Total number of counted induviduals: 57,398
	Total number of species: 56
	Total number of genera: 3
	Total number of families: 3
